# Supplementary material
Source: PubMed Central journal article supplement (PMC4589600)
Supplement: MCB.00116-15_zmb999100989so1.pdf [file MCB.00116-15_zmb999100989so1.pdf]

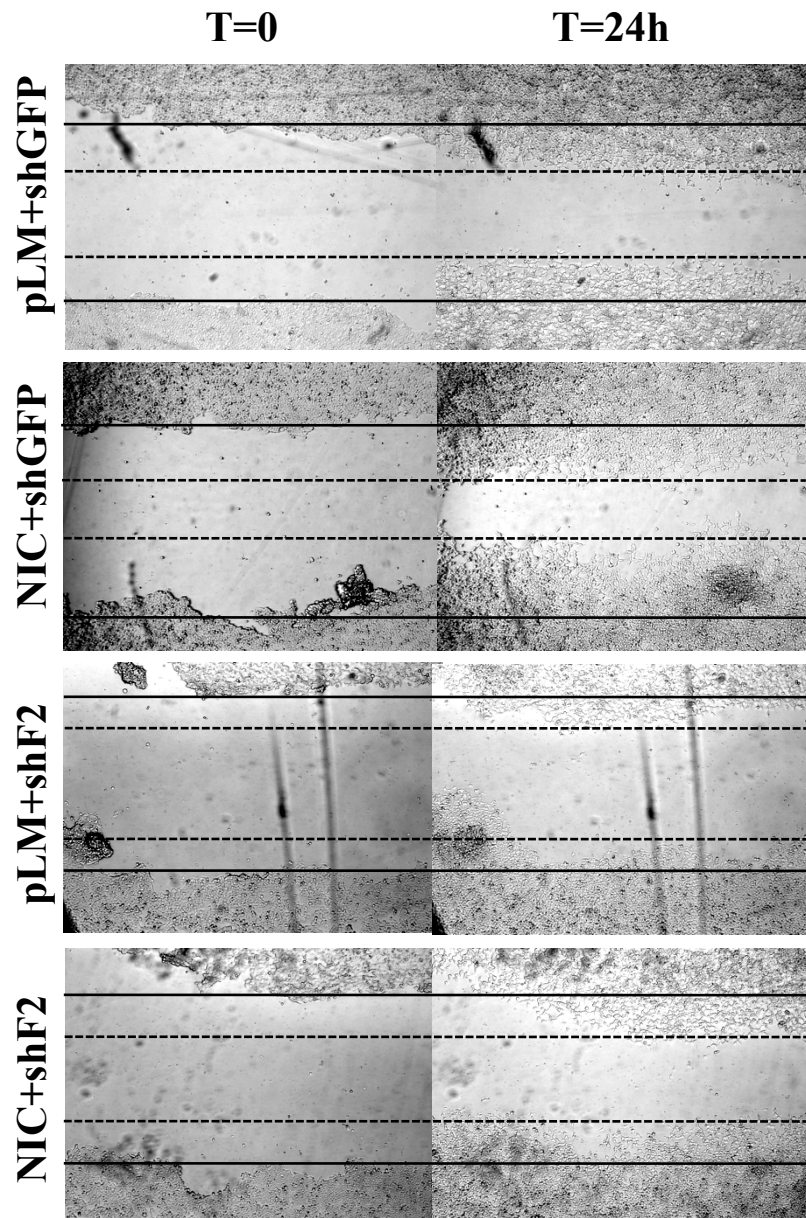

**Suppl. Figure 1:** representative frames of SKMel2 cells as they move within the scratch during 24 hours. Only T0 T24 are shown. Migration from the cell front at time 0 was calculated by measuring the distance from the whole line to the dashed line for each side of the scratch at each time point. Each treatment was done in triplicate. The distance travelled by the cell front was plotted (in figure 8) by averaging the upper and lower front in each frame of the three experiments.
